# Supplementary material for: Spatiotemporal prediction of wildfire size extremes with Bayesian finite sample maxima
Source: PubMed Central journal article supplement (PMC6851762; doi:10.1002/eap.1898), 2019-06-20
Supplement: EAP-29-na-s002.pdf [file EAP-29-na-s002.pdf]

# Spatiotemporal prediction of wildfire size extremes with Bayesian finite sample maxima

## Appendix S2: Joint distributions

Maxwell B. Joseph<sup>\*1</sup>, Matthew W. Rossi<sup>1</sup>, Nathan P. Mietkiewicz<sup>1</sup>, Adam L. Mahood<sup>1</sup>, Megan E. Cattau<sup>1</sup>, Lise Ann St. Denis<sup>1</sup>, R. Chelsea Nagy<sup>1</sup>, Virginia Iglesias<sup>1</sup>, John T. Abatzoglou<sup>2</sup>, and Jennifer K. Balch<sup>1</sup>

<sup>1</sup>*Earth Lab, University of Colorado Boulder*

<sup>2</sup>*Department of Geography, University of Idaho*

Here we provide the unnormalized posterior densities for each model. Square brackets represent a probability mass or density function. Parameterizations for model likelihoods are provided first, followed by the factorization of the joint distribution, with explicit priors.

### **Poisson wildfire count model**

We used the following parameterization of the Poisson distribution:

$$[n|\mu] = \frac{\mu^n e^{-\mu}}{n!},$$

where  $\mu$  is the mean and variance.

The unnormalized posterior density of this model is:

---

<sup>\*</sup>maxwell.b.joseph@colorado.edu

$$\begin{aligned}
& [\boldsymbol{\beta}^{(\mu)}, \alpha^{(\mu)}, \boldsymbol{\phi}, \sigma^{(\phi)}, \eta, \boldsymbol{\lambda}, c, \tau \mid \mathbf{N}] \propto \\
& \prod_{s=1}^S \prod_{t=1}^T [n_{s,t} \mid \boldsymbol{\beta}^{(\mu)}, \alpha^{(\mu)}, \phi_{s,t}] \times \\
& [\boldsymbol{\phi}_1 \mid \sigma^{(\phi)}] \prod_{t=2}^T [\boldsymbol{\phi}_t \mid \boldsymbol{\phi}_{t-1}, \sigma^{(\phi)}, \eta] \times \\
& \prod_{j=1}^p [\beta_j^{(\mu)} \mid \lambda_j, c, \tau] [\lambda_j] \times \\
& [\sigma^{(\phi)}] [\eta] [c] [\tau] [\alpha^{(\mu)}]
\end{aligned}$$

$$\begin{aligned}
& = \prod_{s=1}^S \prod_{t=1}^T \text{Poisson}(n_{s,t} \mid \exp(\alpha^{(\mu)} + \mathbf{X}_{(s,t)} \boldsymbol{\beta}^{(\mu)} + \phi_{s,t})) \times \\
& \quad \text{Normal}(\boldsymbol{\phi}_1 \mid \mathbf{0}, ((\sigma^{(\phi)})^{-2} (\mathbf{D} - \mathbf{W}))^{-1}) \times \\
& \quad \prod_{t=2}^T \text{Normal}(\boldsymbol{\phi}_t \mid \eta \boldsymbol{\phi}_{t-1}, ((\sigma^{(\phi)})^{-2} (\mathbf{D} - \mathbf{W}))^{-1}) \times \\
& \quad \prod_{j=1}^p \text{Normal}\left(\beta_j^{(\mu)} \mid 0, \frac{\tau^2 c^2 \lambda_j^2}{c^2 + \tau^2 \lambda_j^2}\right) \times \text{Cauchy}^+(\lambda_j \mid 0, 1) \times \\
& \text{Normal}^+(\sigma^{(\phi)} \mid 0, 1^2) \times \text{Beta}(\eta \mid 1, 1) \times \text{Inv-Gamma}(c^2 \mid 2.5, 10) \times \\
& \quad \text{Normal}^+(\tau \mid 0, 5^2) \times \text{Normal}(\alpha^{(\mu)} \mid 0, 5^2).
\end{aligned}$$

## Negative binomial wildfire count model

We used the following parameterization of the negative binomial distribution:

$$[n|\mu, \delta] = \binom{n + \delta - 1}{n} \left(\frac{\mu}{\mu + \delta}\right)^n \left(\frac{\delta}{\mu + \delta}\right)^\delta,$$

where  $\mu$  is the mean, and  $\delta$  is a dispersion parameter.

The unnormalized posterior density of this model is:

$$\begin{aligned} & [\boldsymbol{\beta}^{(\mu)}, \boldsymbol{\alpha}^{(\mu)}, \boldsymbol{\phi}, \sigma^{(\phi)}, \eta, \boldsymbol{\lambda}, c, \tau, \delta \mid \mathbf{N}] \propto \\ & \prod_{s=1}^S \prod_{t=1}^T [n_{s,t} | \boldsymbol{\beta}^{(\mu)}, \boldsymbol{\alpha}^{(\mu)}, \boldsymbol{\phi}_{s,t}, \delta] \times \\ & [\boldsymbol{\phi}_1 | \sigma^{(\phi)}] \prod_{t=2}^T [\boldsymbol{\phi}_t | \boldsymbol{\phi}_{t-1}, \sigma^{(\phi)}, \eta] \times \\ & \prod_{j=1}^p [\beta_j^{(\mu)} | \lambda_j, c, \tau] [\lambda_j] \times \\ & [\sigma^{(\phi)}] [\eta] [c] [\tau] [\boldsymbol{\alpha}^{(\mu)}] [\delta] \end{aligned}$$

$$\begin{aligned} & = \prod_{s=1}^S \prod_{t=1}^T \text{Negative Binomial}(n_{s,t} | \exp(\boldsymbol{\alpha}^{(\mu)} + \mathbf{X}_{(s,t)} \boldsymbol{\beta}^{(\mu)} + \boldsymbol{\phi}_{s,t}), \delta) \times \\ & \quad \text{Normal}(\boldsymbol{\phi}_1 | \mathbf{0}, ((\sigma^{(\phi)})^{-2}(\mathbf{D} - \mathbf{W}))^{-1}) \times \\ & \quad \prod_{t=2}^T \text{Normal}(\boldsymbol{\phi}_t | \eta \boldsymbol{\phi}_{t-1}, ((\sigma^{(\phi)})^{-2}(\mathbf{D} - \mathbf{W}))^{-1}) \times \\ & \quad \prod_{j=1}^p \text{Normal}\left(\beta_j^{(\mu)} | 0, \frac{\tau^2 c^2 \lambda_j^2}{c^2 + \tau^2 \lambda_j^2}\right) \times \text{Cauchy}^+(\lambda_j | 0, 1) \times \\ & \quad \text{Normal}^+(\sigma^{(\phi)} | 0, 1^2) \times \text{Beta}(\eta | 1, 1) \times \text{Inv-Gamma}(c^2 | 2.5, 10) \times \\ & \quad \text{Normal}^+(\tau | 0, 5^2) \times \text{Normal}(\boldsymbol{\alpha}^{(\mu)} | 0, 5^2) \times \text{Normal}^+(\delta | 0, 5^2). \end{aligned}$$

## Zero-inflated Poisson wildfire count model

We used the following parameterization of the zero-inflated Poisson distribution:

$$[n|\mu, \pi] = I_{n=0}(1 - \pi + \pi e^{-\mu}) + I_{n>0}\pi \frac{\mu^n e^{-\mu}}{n!},$$

where  $\mu$  is the Poisson mean, and  $1 - \pi$  is the probability of an extra zero.

The unnormalized posterior density of this model is:

$$\begin{aligned} & [\boldsymbol{\beta}^{(\mu)}, \alpha^{(\mu)}, \boldsymbol{\beta}^{(\pi)}, \alpha^{(\pi)}, \boldsymbol{\phi}^{(\mu)}, \sigma^{(\phi, \mu)}, \eta^{(\mu)}, \boldsymbol{\phi}^{(\pi)}, \sigma^{(\phi, \pi)}, \eta^{(\pi)}, \boldsymbol{\lambda}, c, \tau, \rho \mid \mathbf{N}] \propto \\ & \prod_{s=1}^S \prod_{t=1}^T [n_{s,t} | \boldsymbol{\beta}^{(\mu)}, \alpha^{(\mu)}, \boldsymbol{\beta}^{(\pi)}, \alpha^{(\pi)}, \phi_{s,t}^{(\mu)}, \phi_{s,t}^{(\pi)}] \times \\ & [\phi_1^{(\mu)} | \sigma^{(\phi, \mu)}] \prod_{t=2}^T [\phi_t^{(\mu)} | \phi_{t-1}^{(\mu)}, \sigma^{(\phi, \mu)}, \eta^{(\mu)}] \times \\ & [\phi_1^{(\pi)} | \sigma^{(\phi, \pi)}] \prod_{t=2}^T [\phi_t^{(\pi)} | \phi_{t-1}^{(\pi)}, \sigma^{(\phi, \pi)}, \eta^{(\pi)}] \times \\ & \prod_{j=1}^p [\beta_j^{(\mu)}, \beta_j^{(\pi)} | \lambda_j, c, \tau, \rho] [\lambda_j] \times \\ & [\sigma^{(\phi, \mu)}] [\sigma^{(\phi, \pi)}] [\eta^{(\mu)}] [\eta^{(\pi)}] [\alpha^{(\mu)}] [\alpha^{(\pi)}] [\rho] \prod_{m=1}^2 [c_m] [\tau_m] \end{aligned}$$

$$\begin{aligned}
&= \prod_{s=1}^S \prod_{t=1}^T \text{ZIP}(n_{s,t} | e^{\alpha^{(\mu)} + \mathbf{X}_{(s,t)} \boldsymbol{\beta}^{(\mu)} + \phi_{s,t}^{(\mu)}}, \text{logit}^{-1}(\alpha^{(\pi)} + \mathbf{X}_{(s,t)} \boldsymbol{\beta}^{(\pi)} + \phi_{s,t}^{(\pi)})) \times \\
&\quad \text{Normal}(\boldsymbol{\phi}_1^{(\mu)} | \mathbf{0}, ((\sigma^{(\phi, \mu)})^{-2} (\mathbf{D} - \mathbf{W}))^{-1}) \times \\
&\quad \prod_{t=2}^T \text{Normal}(\boldsymbol{\phi}_t^{(\mu)} | \eta^{(\mu)} \boldsymbol{\phi}_{t-1}^{(\mu)}, ((\sigma^{(\phi, \mu)})^{-2} (\mathbf{D} - \mathbf{W}))^{-1}) \times \\
&\quad \text{Normal}(\boldsymbol{\phi}_1^{(\pi)} | \mathbf{0}, ((\sigma^{(\phi, \pi)})^{-2} (\mathbf{D} - \mathbf{W}))^{-1}) \times \\
&\quad \prod_{t=2}^T \text{Normal}(\boldsymbol{\phi}_t^{(\pi)} | \eta^{(\pi)} \boldsymbol{\phi}_{t-1}^{(\pi)}, ((\sigma^{(\phi, \pi)})^{-2} (\mathbf{D} - \mathbf{W}))^{-1}) \times \\
&\quad \prod_{j=1}^p \text{N} \left( \begin{pmatrix} \beta_j^{(\mu)} \\ \beta_j^{(\pi)} \end{pmatrix} \middle| \mathbf{0}, \begin{pmatrix} \tau_1^2 \frac{c_1^2 \lambda_j^2}{c_1^2 + \tau_1^2 \lambda_j^2} & \rho \tau_1 \tau_2 \sqrt{\frac{c_1^2 \lambda_j^2}{c_1^2 + \tau_1^2 \lambda_j^2}} \sqrt{\frac{c_2^2 \lambda_j^2}{c_2^2 + \tau_2^2 \lambda_j^2}} \\ \rho \tau_1 \tau_2 \sqrt{\frac{c_1^2 \lambda_j^2}{c_1^2 + \tau_1^2 \lambda_j^2}} \sqrt{\frac{c_2^2 \lambda_j^2}{c_2^2 + \tau_2^2 \lambda_j^2}} & \tau_2^2 \frac{c_2^2 \lambda_j^2}{c_2^2 + \tau_2^2 \lambda_j^2} \end{pmatrix} \right) \times \\
&\quad \prod_{j=1}^p \text{Cauchy}^+(\lambda_j | 0, 1) \times \\
&\quad \text{Normal}^+(\sigma^{(\phi, \mu)} | 0, 1^2) \times \text{Normal}^+(\sigma^{(\phi, \pi)} | 0, 1^2) \times \\
&\quad \text{Beta}(\eta^{(\mu)} | 1, 1) \times \text{Beta}(\eta^{(\pi)} | 1, 1) \times \\
&\quad \text{Normal}(\alpha^{(\mu)} | 0, 5^2) \times \text{Normal}(\alpha^{(\pi)} | 0, 5^2) \times \text{LKJ}(\rho | 3) \times \\
&\quad \prod_{m=1}^2 \text{Inv-Gamma}(c_m^2 | 2.5, 10) \times \text{Normal}^+(\tau_m | 0, 5^2).
\end{aligned}$$

## Zero-inflated negative binomial wildfire count model

We used the following parameterization of the zero-inflated negative binomial distribution:

$$[n|\mu, \delta, \pi] = I_{n=0}(1 - \pi + \pi\left(\frac{\delta}{\mu + \delta}\right)^\delta) + I_{n>0}\binom{n + \delta - 1}{n}\left(\frac{\mu}{\mu + \delta}\right)^n\left(\frac{\delta}{\mu + \delta}\right)^\delta,$$

where  $\mu$  is the negative binomial mean,  $\delta$  is the negative binomial dispersion, and  $\pi$  and  $1 - \pi$  is the probability of an extra zero.

The unnormalized posterior density of this model is:

$$\begin{aligned} & [\boldsymbol{\beta}^{(\mu)}, \alpha^{(\mu)}, \boldsymbol{\beta}^{(\pi)}, \alpha^{(\pi)}, \boldsymbol{\phi}^{(\mu)}, \boldsymbol{\sigma}^{(\phi, \mu)}, \boldsymbol{\eta}^{(\mu)}, \boldsymbol{\phi}^{(\pi)}, \boldsymbol{\sigma}^{(\phi, \pi)}, \boldsymbol{\eta}^{(\pi)}, \boldsymbol{\lambda}, c, \tau, \rho, \delta | \mathbf{N}] \propto \\ & \prod_{s=1}^S \prod_{t=1}^T [n_{s,t} | \boldsymbol{\beta}^{(\mu)}, \alpha^{(\mu)}, \boldsymbol{\beta}^{(\pi)}, \alpha^{(\pi)}, \phi_{s,t}^{(\mu)}, \phi_{s,t}^{(\pi)}, \delta] \times \\ & [\phi_1^{(\mu)} | \boldsymbol{\sigma}^{(\phi, \mu)}] \prod_{t=2}^T [\phi_t^{(\mu)} | \phi_{t-1}^{(\mu)}, \boldsymbol{\sigma}^{(\phi, \mu)}, \boldsymbol{\eta}^{(\mu)}] \times \\ & [\phi_1^{(\pi)} | \boldsymbol{\sigma}^{(\phi, \pi)}] \prod_{t=2}^T [\phi_t^{(\pi)} | \phi_{t-1}^{(\pi)}, \boldsymbol{\sigma}^{(\phi, \pi)}, \boldsymbol{\eta}^{(\pi)}] \times \\ & \prod_{j=1}^p [\beta_j^{(\mu)}, \beta_j^{(\pi)} | \lambda_j, c, \tau, \rho] [\lambda_j] \times \\ & [\boldsymbol{\sigma}^{(\phi, \mu)}][\boldsymbol{\sigma}^{(\phi, \pi)}][\boldsymbol{\eta}^{(\mu)}][\boldsymbol{\eta}^{(\pi)}][\alpha^{(\mu)}][\alpha^{(\pi)}][\rho][\delta] \prod_{m=1}^2 [c_m][\tau_m]. \end{aligned}$$

$$\begin{aligned}
&= \prod_{s=1}^S \prod_{t=1}^T \text{ZINB}(n_{s,t} | e^{\alpha^{(\mu)} + \mathbf{X}_{(s,t)} \boldsymbol{\beta}^{(\mu)} + \phi_{s,t}^{(\mu)}}, \delta, \text{logit}^{-1}(\alpha^{(\pi)} + \mathbf{X}_{(s,t)} \boldsymbol{\beta}^{(\pi)} + \phi_{s,t}^{(\pi)})) \times \\
&\quad \text{Normal}(\boldsymbol{\phi}_1^{(\mu)} | \mathbf{0}, ((\sigma^{(\phi, \mu)})^{-2}(\mathbf{D} - \mathbf{W}))^{-1}) \times \\
&\quad \prod_{t=2}^T \text{Normal}(\boldsymbol{\phi}_t^{(\mu)} | \boldsymbol{\eta}^{(\mu)} \boldsymbol{\phi}_{t-1}^{(\mu)}, ((\sigma^{(\phi, \mu)})^{-2}(\mathbf{D} - \mathbf{W}))^{-1}) \times \\
&\quad \text{Normal}(\boldsymbol{\phi}_1^{(\pi)} | \mathbf{0}, ((\sigma^{(\phi, \pi)})^{-2}(\mathbf{D} - \mathbf{W}))^{-1}) \times \\
&\quad \prod_{t=2}^T \text{Normal}(\boldsymbol{\phi}_t^{(\pi)} | \boldsymbol{\eta}^{(\pi)} \boldsymbol{\phi}_{t-1}^{(\pi)}, ((\sigma^{(\phi, \pi)})^{-2}(\mathbf{D} - \mathbf{W}))^{-1}) \times \\
&\quad \prod_{j=1}^p \text{N} \left( \begin{pmatrix} \beta_j^{(\mu)} \\ \beta_j^{(\pi)} \end{pmatrix} \middle| \mathbf{0}, \begin{pmatrix} \tau_1^2 \frac{c_1^2 \lambda_j^2}{c_1^2 + \tau_1^2 \lambda_j^2} & \rho \tau_1 \tau_2 \sqrt{\frac{c_1^2 \lambda_j^2}{c_1^2 + \tau_1^2 \lambda_j^2}} \sqrt{\frac{c_2^2 \lambda_j^2}{c_2^2 + \tau_2^2 \lambda_j^2}} \\ \rho \tau_1 \tau_2 \sqrt{\frac{c_1^2 \lambda_j^2}{c_1^2 + \tau_1^2 \lambda_j^2}} \sqrt{\frac{c_2^2 \lambda_j^2}{c_2^2 + \tau_2^2 \lambda_j^2}} & \tau_2^2 \frac{c_2^2 \lambda_j^2}{c_2^2 + \tau_2^2 \lambda_j^2} \end{pmatrix} \right) \times \\
&\quad \prod_{j=1}^p \text{Cauchy}^+(\lambda_j | 0, 1) \times \\
&\quad \text{Normal}^+(\sigma^{(\phi, \mu)} | 0, 1^2) \times \text{Normal}^+(\sigma^{(\phi, \pi)} | 0, 1^2) \times \\
&\quad \text{Beta}(\eta^{(\mu)} | 1, 1) \times \text{Beta}(\eta^{(\pi)} | 1, 1) \times \\
&\quad \text{Normal}(\alpha^{(\mu)} | 0, 5^2) \times \text{Normal}(\alpha^{(\pi)} | 0, 5^2) \times \text{LKJ}(\rho | 3) \times \text{Normal}^+(\delta | 0, 5^2) \times \\
&\quad \prod_{m=1}^2 \text{Inv-Gamma}(c_m^2 | 2.5, 10) \times \text{Normal}^+(\tau_m | 0, 5^2).
\end{aligned}$$

## Generalized Pareto/Lomax burned area model

We used the following parameterization of the GPD/Lomax distribution:

$$[y|\sigma, \kappa] = \frac{1}{\sigma} \left( \frac{\kappa y}{\sigma} + 1 \right)^{-(\kappa+1)\kappa^{-1}},$$

where  $\kappa$  is a shape parameter and  $\sigma$  is a scale parameter.

The unnormalized posterior density of this model is:

$$\begin{aligned} [\boldsymbol{\beta}, \alpha, \boldsymbol{\phi}, \sigma^{(\phi)}, \eta, \kappa^{(L)}, \boldsymbol{\lambda}, c, \tau | \mathbf{y}] &\propto \\ &\prod_{i=1}^{n_{\text{tot}}} [y_i | \boldsymbol{\beta}, \alpha, \phi_{s_i, t_i}, \kappa^{(L)}] \times \\ &[\boldsymbol{\phi}_1 | \sigma^{(\phi)}] \prod_{t=2}^T [\boldsymbol{\phi}_t | \boldsymbol{\phi}_{t-1}, \sigma^{(\phi)}, \eta] \times \\ &\prod_{j=1}^p [\beta_j | \lambda_j, c, \tau] [\lambda_j] \times \\ &[\alpha][c][\tau][\kappa^{(L)}][\eta][\sigma^{(\phi)}] \\ &= \prod_{i=1}^{n_{\text{tot}}} \text{Lomax}(y_i | \kappa^{(L)}, e^{\alpha + \mathbf{X}_{(s_i, t_i)} \boldsymbol{\beta} + \phi_{s_i, t_i}}) \times \\ &\text{Normal}(\boldsymbol{\phi}_1 | \mathbf{0}, ((\sigma^{(\phi)})^{-2}(\mathbf{D} - \mathbf{W}))^{-1}) \times \\ &\prod_{t=2}^T \text{Normal}(\boldsymbol{\phi}_t | \eta \boldsymbol{\phi}_{t-1}, ((\sigma^{(\phi)})^{-2}(\mathbf{D} - \mathbf{W}))^{-1}) \times \\ &\prod_{j=1}^p \text{Normal}\left(\beta_j | 0, \frac{\tau^2 c^2 \lambda_j^2}{c^2 + \tau^2 \lambda_j^2}\right) \times \text{Cauchy}^+(\lambda_j | 0, 1) \times \\ &\text{Normal}(\alpha | 0, 5^2) \times \text{Inv-Gamma}(c^2 | 2.5, 10) \times \text{Normal}^+(\tau | 0, 5^2) \\ &\text{Normal}^+(\kappa^{(L)} | 0, 5^2) \times \text{Beta}(\eta | 1, 1) \times \text{Normal}^+(\sigma^{(\phi)} | 0, 1^2). \end{aligned}$$



## Tapered Pareto burned area model

We used the following parameterization of the tapered Pareto distribution:

$$[y|\kappa, \nu] = \left(\frac{\kappa}{y} + \frac{1}{\nu}\right) \exp(-x/\nu),$$

where  $\kappa$  is a shape parameter and  $\nu$  a taper parameter.

The unnormalized posterior density of this model is:

$$\begin{aligned} & [\boldsymbol{\beta}, \alpha, \boldsymbol{\phi}, \sigma^{(\phi)}, \eta, \nu, \boldsymbol{\lambda}, c, \tau | \mathbf{y}] \propto \\ & \prod_{i=1}^{n_{\text{tot}}} [y_i | \boldsymbol{\beta}, \alpha, \phi_{s_i, t_i}, \nu] \times \\ & [\boldsymbol{\phi}_1 | \sigma^{(\phi)}] \prod_{t=2}^T [\boldsymbol{\phi}_t | \boldsymbol{\phi}_{t-1}, \sigma^{(\phi)}, \eta] \times \\ & \prod_{j=1}^p [\beta_j | \lambda_j, c, \tau] [\lambda_j] \times \\ & [\alpha] [c] [\tau] [\nu] [\eta] [\sigma^{(\phi)}] \\ & = \prod_{i=1}^{n_{\text{tot}}} \text{Tapered Pareto}(y_i | e^{\alpha + \mathbf{X}_{(s_i, t_i)} \boldsymbol{\beta} + \phi_{s_i, t_i}}, \nu) \times \\ & \quad \text{Normal}(\boldsymbol{\phi}_1 | \mathbf{0}, ((\sigma^{(\phi)})^{-2} (\mathbf{D} - \mathbf{W}))^{-1}) \times \\ & \quad \prod_{t=2}^T \text{Normal}(\boldsymbol{\phi}_t | \eta \boldsymbol{\phi}_{t-1}, ((\sigma^{(\phi)})^{-2} (\mathbf{D} - \mathbf{W}))^{-1}) \times \\ & \quad \prod_{j=1}^p \text{Normal}\left(\beta_j | 0, \frac{\tau^2 c^2 \lambda_j^2}{c^2 + \tau^2 \lambda_j^2}\right) \times \text{Cauchy}^+(\lambda_j | 0, 1) \times \\ & \text{Normal}(\alpha | 0, 5^2) \times \text{Inv-Gamma}(c^2 | 2.5, 10) \times \text{Normal}^+(\tau | 0, 5^2) \times \\ & \text{Cauchy}^+(\nu | 0, 1) \times \text{Beta}(\eta | 1, 1) \times \text{Normal}^+(\sigma^{(\phi)} | 0, 1^2). \end{aligned}$$

## Lognormal burned area model

We used the following parameterization of the lognormal distribution:

$$[y|\mu, \sigma] = \frac{1}{y} \frac{1}{\sigma\sqrt{2\pi}} \exp\left(-\frac{(\log(y) - \mu)^2}{2\sigma^2}\right),$$

where  $\mu$  and  $\sigma$  are location and scale parameters, respectively.

The unnormalized posterior density of this model is:

$$\begin{aligned} [\boldsymbol{\beta}, \alpha, \boldsymbol{\phi}, \sigma^{(\phi)}, \eta, \sigma, \boldsymbol{\lambda}, c, \tau | \mathbf{y}] &\propto \\ &\prod_{i=1}^{n_{\text{tot}}} [y_i | \beta, \alpha, \phi_{s_i, t_i}, \sigma] \times \\ &[\boldsymbol{\phi}_1 | \sigma^{(\phi)}] \prod_{t=2}^T [\boldsymbol{\phi}_t | \boldsymbol{\phi}_{t-1}, \sigma^{(\phi)}, \eta] \times \\ &\prod_{j=1}^p [\beta_j | \lambda_j, c, \tau] [\lambda_j] \times \\ &[\alpha][c][\tau][\sigma][\eta][\sigma^{(\phi)}] \\ &= \prod_{i=1}^{n_{\text{tot}}} \text{Lognormal}(y_i | \alpha + \mathbf{X}_{(s_i, t_i)} \boldsymbol{\beta} + \phi_{s_i, t_i}, \sigma) \times \\ &\quad \text{Normal}(\boldsymbol{\phi}_1 | \mathbf{0}, ((\sigma^{(\phi)})^{-2} (\mathbf{D} - \mathbf{W}))^{-1}) \times \\ &\quad \prod_{t=2}^T \text{Normal}(\boldsymbol{\phi}_t | \eta \boldsymbol{\phi}_{t-1}, ((\sigma^{(\phi)})^{-2} (\mathbf{D} - \mathbf{W}))^{-1}) \times \\ &\quad \prod_{j=1}^p \text{Normal}\left(\beta_j | 0, \frac{\tau^2 c^2 \lambda_j^2}{c^2 + \tau^2 \lambda_j^2}\right) \times \text{Cauchy}^+(\lambda_j | 0, 1) \times \\ &\quad \text{Normal}(\alpha | 0, 5^2) \times \text{Inv-Gamma}(c^2 | 2.5, 10) \times \text{Normal}^+(\tau | 0, 5^2) \times \\ &\quad \text{Normal}^+(\sigma | 0, 5^2) \times \text{Beta}(\eta | 1, 1) \times \text{Normal}^+(\sigma^{(\phi)} | 0, 1^2). \end{aligned}$$

## Gamma burned area model

We used the following parameterization of the gamma distribution:

$$[y|\kappa, \sigma] = \frac{1}{\Gamma(\kappa)\sigma^\kappa} y^{\kappa-1} \exp(-y/\sigma),$$

where  $\kappa$  is a shape parameter and  $\sigma$  a scale parameter.

The unnormalized posterior density of this model is:

$$\begin{aligned}
& [\boldsymbol{\beta}, \alpha, \boldsymbol{\phi}, \sigma^{(\phi)}, \eta, \kappa, \boldsymbol{\lambda}, c, \tau \mid \mathbf{y}] \propto \\
& \prod_{i=1}^{n_{\text{tot}}} [y_i | \beta, \alpha, \phi_{s_i, t_i}, \kappa] \times \\
& [\boldsymbol{\phi}_1 | \sigma^{(\phi)}] \prod_{t=2}^T [\boldsymbol{\phi}_t | \boldsymbol{\phi}_{t-1}, \sigma^{(\phi)}, \eta] \times \\
& \prod_{j=1}^p [\beta_j | \lambda_j, c, \tau] [\lambda_j] \times \\
& [\alpha] [c] [\tau] [\kappa] [\eta] [\sigma^{(\phi)}] \\
& = \prod_{i=1}^{n_{\text{tot}}} \text{Gamma}(y_i | \kappa, \kappa / \exp(\alpha + \mathbf{X}_{(s_i, t_i)} \boldsymbol{\beta} + \phi_{s_i, t_i})) \times \\
& \quad \text{Normal}(\boldsymbol{\phi}_1 | \mathbf{0}, ((\sigma^{(\phi)})^{-2} (\mathbf{D} - \mathbf{W}))^{-1}) \times \\
& \quad \prod_{t=2}^T \text{Normal}(\boldsymbol{\phi}_t | \eta \boldsymbol{\phi}_{t-1}, ((\sigma^{(\phi)})^{-2} (\mathbf{D} - \mathbf{W}))^{-1}) \times \\
& \quad \prod_{j=1}^p \text{Normal}\left(\beta_j | 0, \frac{\tau^2 c^2 \lambda_j^2}{c^2 + \tau^2 \lambda_j^2}\right) \times \text{Cauchy}^+(\lambda_j | 0, 1) \times \\
& \text{Normal}(\alpha | 0, 5^2) \times \text{Inv-Gamma}(c^2 | 2.5, 10) \times \text{Normal}^+(\tau | 0, 5^2) \times \\
& \text{Normal}^+(\kappa | 0, 5^2) \times \text{Beta}(\eta | 1, 1) \times \text{Normal}^+(\sigma^{(\phi)} | 0, 1^2).
\end{aligned}$$

## Weibull burned area model

We used the following parameterization of the Weibull distribution:

$$[y|\kappa, \sigma] = \frac{\kappa}{\sigma} \left(\frac{y}{\sigma}\right)^{\kappa-1} \exp\left(-\left(\frac{y}{\sigma}\right)^\kappa\right),$$

where  $\kappa$  is a shape parameter and  $\sigma$  is a scale parameter.

The unnormalized posterior density of this model is:

$$\begin{aligned} & [\boldsymbol{\beta}, \alpha, \boldsymbol{\phi}, \sigma^{(\phi)}, \eta, \kappa, \lambda, c, \tau | \mathbf{y}] \propto \\ & \prod_{i=1}^{n_{\text{tot}}} [y_i | \beta, \alpha, \phi_{s_i, t_i}, \kappa] \times \\ & [\boldsymbol{\phi}_1 | \sigma^{(\phi)}] \prod_{t=2}^T [\boldsymbol{\phi}_t | \boldsymbol{\phi}_{t-1}, \sigma^{(\phi)}, \eta] \times \\ & \prod_{j=1}^p [\beta_j | \lambda_j, c, \tau] [\lambda_j] \times \\ & [\alpha] [c] [\tau] [\kappa] [\eta] [\sigma^{(\phi)}] \\ & = \prod_{i=1}^{n_{\text{tot}}} \text{Weibull}(y_i | \kappa, \exp(\alpha + \mathbf{X}_{(s_i, t_i)} \boldsymbol{\beta} + \phi_{s_i, t_i})) \times \\ & \quad \text{Normal}(\boldsymbol{\phi}_1 | \mathbf{0}, ((\sigma^{(\phi)})^{-2} (\mathbf{D} - \mathbf{W}))^{-1}) \times \\ & \quad \prod_{t=2}^T \text{Normal}(\boldsymbol{\phi}_t | \eta \boldsymbol{\phi}_{t-1}, ((\sigma^{(\phi)})^{-2} (\mathbf{D} - \mathbf{W}))^{-1}) \times \\ & \quad \prod_{j=1}^p \text{Normal}\left(\beta_j | 0, \frac{\tau^2 c^2 \lambda_j^2}{c^2 + \tau^2 \lambda_j^2}\right) \times \text{Cauchy}^+(\lambda_j | 0, 1) \times \\ & \quad \text{Normal}(\alpha | 0, 5^2) \times \text{Inv-Gamma}(c^2 | 2.5, 10) \times \text{Normal}^+(\tau | 0, 5^2) \times \\ & \quad \text{Normal}^+(\kappa | 0, 5^2) \times \text{Beta}(\eta | 1, 1) \times \text{Normal}^+(\sigma^{(\phi)} | 0, 1^2). \end{aligned}$$
